# Supplementary material for: Erythropoietin Dose and Mortality in Hemodialysis Patients: Marginal Structural Model to Examine Causality
Source: Hindawi journal article supplement (doi:10.1155/2016/6087134), 2016-01-01
Supplement: f1 [file 6087134.f1.pdf]

Supplement Table 1

|                                                                                  |
|----------------------------------------------------------------------------------|
| <b>Cause of Death</b>                                                            |
| <b>Cardiovascular Mortality</b>                                                  |
| Myocardial Infarction, Acute                                                     |
| Pericarditis, Incl. Cardiac Tamponade                                            |
| Atherosclerotic Heart Disease                                                    |
| Cardiomyopathy                                                                   |
| Cardiac Arrest, Cause Unknown                                                    |
| Valvular Heart Disease                                                           |
| Pulmonary Edema Due To Exogenous Fluid                                           |
| Congestive heart failure                                                         |
| Pulmonary Embolus                                                                |
| Cerebro-Vascular Accident Including Intracranial Hemorrhage                      |
| Ischemic Brain Damage/Anoxic Encephalopathy                                      |
| <b>Infectious Mortality</b>                                                      |
| Cardiac Arrhythmia                                                               |
| Septicemia due to internal vascular access                                       |
| Septicemia due to vascular access catheter                                       |
| Peritoneal access infectious complication, bacterial                             |
| Peritoneal access infectious complication, fungal                                |
| Peritonitis (complication of peritoneal dialysis)                                |
| Central nervous system infection (brain abscess, meningitis, encephalitis, etc.) |
| Septicemia, Due To Vascular Access *Discontinued, as of Oct 2004                 |
| Septicemia, Due To Peritonitis                                                   |
| Septicemia, Due To Peripheral Vascular Disease, Gangrene                         |
| Septicemia, Other                                                                |
| Pulmonary Infection (Bacterial)                                                  |
| Pulmonary Infection (Fungal)                                                     |
| Pulmonary Infection (Other)                                                      |
| Viral Infection, Cmv                                                             |
| Viral Infection, Other (Not 64 Or 65)                                            |
| Tuberculosis                                                                     |
| Aids                                                                             |
| Infection, Other                                                                 |
| Cardiac infection (endocarditis)                                                 |
| Pulmonary infection (pneumonia, influenza)                                       |

|                                                                                                               |
|---------------------------------------------------------------------------------------------------------------|
| Abdominal infection (peritonitis-not complication of PD, perforated bowel, diverticular disease, gallbladder) |
| Hepatitis B                                                                                                   |
| Other Viral Hepatitis                                                                                         |
| Genito-urinary infection (urinary tract infection, pyelonephritis, renal abscess)                             |
| Hepatitis C                                                                                                   |
| Fungal Peritonitis                                                                                            |
